# Supplementary material
Source: PubMed Central journal article supplement (PMC3122269)
Supplement: NIHMS300731-supplement-supplement_1.pdf [file NIHMS300731-supplement-supplement_1.pdf]

**Supplementary Table A. Effect Modification of *NAT1* and *NAT2* in Relation to PCa Susceptibility.**

| # <i>NAT1</i> *10 alleles | #Slow <i>NAT2</i> Alleles | Cases (%)    Controls (%) | Estimated OR (95% CI) <sup>a</sup> | Estimated OR (95% CI) <sup>b</sup> | P-value for Interaction |
|---------------------------|---------------------------|---------------------------|------------------------------------|------------------------------------|-------------------------|
| 0 or 1                    | 0 <i>NAT2</i> Slow        | 12 (7.1)    43 (9.4)      | 1.00 (Referent)                    | 1.00 (Referent)                    | 0.2897                  |
| 0 or 1                    | 1 <i>NAT2</i> Slow        | 58 (34.3)    158 (34.8)   | 1.32 (0.65-2.67)                   | 1.01 (0.46-2.22)                   |                         |
| 0 or 1                    | 2 <i>NAT2</i> Slow        | 63 (37.3)    132 (29.1)   | 1.71 (0.84-3.47)                   | 1.63 (0.74-3.58)                   |                         |
| 2                         | 0 <i>NAT2</i> Slow        | 3 (1.8)    18 (4.0)       | 0.60 (0.15-2.37)                   | 0.73 (0.17-3.13)                   |                         |
| 2                         | 1 <i>NAT2</i> Slow        | 22 (13.0)    54 (11.9)    | 1.46 (0.65-3.28)                   | 1.18 (0.48-2.90)                   |                         |
| 2                         | 2 <i>NAT2</i> Slow        | 11 (6.5)    49 (10.8)     | 0.80 (0.32-2.01)                   | 0.75 (0.28-2.04)                   |                         |
| 0 or 1                    | 0 <i>NAT2</i> Rapid       | 63 (37.3)    132 (29.1)   | 1.00 (Referent)                    | 1.00 (Referent)                    | 0.2156                  |
| 0 or 1                    | 1 <i>NAT2</i> Rapid       | 58 (34.3)    158 (34.8)   | 0.77 (0.50-1.18)                   | 0.62 (0.38-1.02)                   |                         |
| 0 or 1                    | 2 <i>NAT2</i> Rapid       | 12 (7.1)    43 (9.4)      | 0.58 (0.29-1.18)                   | 0.61 (0.28-1.34)                   |                         |
| 2                         | 0 <i>NAT2</i> Rapid       | 11 (6.5)    49 (10.8)     | 0.47 (0.23-0.97)                   | 0.46 (0.21-1.01)                   |                         |
| 2                         | 1 <i>NAT2</i> Rapid       | 22 (13.0)    54 (11.9)    | 0.85 (0.48-1.52)                   | 0.72 (0.38-1.40)                   |                         |
| 2                         | 2 <i>NAT2</i> Rapid       | 3 (1.8)    18 (4.0)       | 0.35 (0.10-1.23)                   | 0.45 (0.12-1.68)                   |                         |

<sup>a</sup>Associations were determined using univariate logistic regression models to estimate the risk of developing PCa. 151 subjects had missing genotype data for *NAT1* and/or *NAT2*.

<sup>b</sup>Risk estimates adjusted for age (continuous variable) and West African Ancestry (WAA; continuous variable).

**Supplementary Table B. Combined Effects of *N*-acetyltransferase Polymorphisms and Cigarette Smoking on PCa risk**

| <i>N</i> -Acetyltransferase status | Unadjusted OR (95%CI) <sup>a</sup> |                             | Adjusted OR (95%CI) <sup>b</sup> |                  |
|------------------------------------|------------------------------------|-----------------------------|----------------------------------|------------------|
|                                    | #Cases  #Ctrls <sup>c</sup>        |                             | Non-smokers                      | Ever-smokers     |
| <i>NAT2</i> Rapid alleles          | 1.00 (Reference)<br>5  5           | 2.04 (0.54-7.62)<br>57  28  | 1.00 (Reference)                 | 1.46 (0.33-6.45) |
| ≥1 <i>NAT2</i> Slow allele(s)      | 0.71 (0.13-3.87)<br>5  7           | 3.19 (0.84-12.10)<br>67  21 | 0.33 (0.05-2.24)                 | 2.06 (0.45-9.42) |
| p-value for interaction            | 0.1445                             |                             |                                  |                  |

<sup>a</sup>Associations were determined using multivariate logistic regression models to estimate the risk of developing PCa using Inheritance of two *NAT2* rapid alleles and non-smokers as the referent category.

<sup>b</sup>Risk estimates adjusted for age and West African Ancestry, modeled as continuous variables.

<sup>c</sup>The analysis was restricted to study participants who had available smoking and *N*-acetyltransferase genotype status analysis.
